# Supplementary material for: Metabolic regulation analysis of wild-type and arcA mutant Escherichia coli under nitrate conditions using different levels of omics data
Source: Royal Society of Chemistry journal article supplement (doi:10.1039/c2mb25069a), 2012-05-17
Supplement: c2mb25069a_2.pdf [file c2mb25069a_2.pdf]

# Supplementary Table SII

| Net Flux                            | WT    |                     | WT    |                     | ArcA  |                     |
|-------------------------------------|-------|---------------------|-------|---------------------|-------|---------------------|
|                                     | Ø2    | Confidence interval | NO3   | Confidence interval | NO3   | Confidence interval |
| GLC + PEP => G6P + PYR              | 100.0 | [100.0 - 100.0]     | 100.0 | [100.0 - 100.0]     | 100.0 | [100.0 - 100.0]     |
| G6P <=> F6P                         | 76.8  | [74.8 - 77.2]       | 49.2  | [48.5 - 51.6]       | 67.7  | [67.5 - 68.9]       |
| F6P => F16P                         | 77.2  | [74.4 - 77.2]       | 76.7  | [67.3 - 78.7]       | 67.3  | [67.0 - 68.3]       |
| F16P <=> DHAP + G3P                 | 77.2  | [74.4 - 77.2]       | 76.7  | [67.3 - 78.7]       | 67.3  | [67.0 - 68.3]       |
| DHAP <=> G3P                        | 77.2  | [74.4 - 77.2]       | 76.7  | [67.3 - 78.7]       | 67.3  | [67.0 - 68.3]       |
| G3P => 3PG                          | 173.6 | [170.8 - 173.6]     | 171.9 | [162.5 - 174.0]     | 162.1 | [161.8 - 163.2]     |
| 3PG <=> PEP                         | 170.8 | [168.0 - 170.8]     | 168.2 | [158.8 - 170.3]     | 158.1 | [157.8 - 159.2]     |
| PEP => PYR                          | 60.8  | [58.0 - 60.8]       | 59.0  | [50.5 - 62.0]       | 56.7  | [55.7 - 57.9]       |
| PYR => ACA + CO2                    | 10.1  | [10.0 - 10.7]       | 16.2  | [16.0 - 22.9]       | 31.4  | [30.4 - 32.0]       |
| PYR => ACA + FOR                    | 162.9 | [162.9 - 162.9]     | 140.8 | [140.8 - 140.8]     | 145.6 | [145.6 - 145.6]     |
| ACA => ETH                          | 67.6  | [67.6 - 67.6]       | 0.2   | [0.2 - 0.2]         | 0.1   | [0.1 - 0.1]         |
| PYR => LAC                          | 1.7   | [1.7 - 1.7]         | 0.0   | [0.0 - 0.0]         | 0.1   | [0.1 - 0.1]         |
| PEP + CO2 <=> OAA                   | 9.0   | [8.9 - 9.1]         | 7.9   | [5.8 - 8.2]         | 0.0   | [-0.6 - 1.1]        |
| G6P => 6PG                          | 22.8  | [22.4 - 24.8]       | 50.3  | [47.8 - 51.0]       | 31.7  | [30.5 - 31.9]       |
| 6PG => Ru5P + CO2                   | 3.1   | [1.4 - 3.2]         | 44.6  | [28.7 - 46.8]       | 3.0   | [2.2 - 3.5]         |
| Ru5P <=> X5P                        | 0.6   | [-0.6 - 0.6]        | 27.7  | [17.1 - 29.2]       | -0.1  | [-0.7 - 0.2]        |
| Ru5P <=> R5P                        | 2.5   | [2.0 - 2.6]         | 16.8  | [11.5 - 17.6]       | 3.2   | [2.9 - 3.3]         |
| R5P + X5P <=> S7P + G3P             | 0.7   | [0.1 - 0.7]         | 14.4  | [9.1 - 15.2]        | 0.5   | [0.3 - 0.7]         |
| S7P + G3P <=> E4P + F6P             | 0.7   | [0.1 - 0.7]         | 14.4  | [9.1 - 15.2]        | 0.5   | [0.3 - 0.7]         |
| X5P + E4P <=> F6P + G3P             | -0.1  | [-0.7 - -0.1]       | 13.3  | [8.0 - 14.1]        | -0.7  | [-0.9 - -0.5]       |
| ACA + OAA => CIT                    | 6.9   | [6.8 - 7.5]         | 11.3  | [10.6 - 16.6]       | 53.3  | [53.1 - 53.5]       |
| CIT => ICT                          | 6.9   | [6.8 - 7.5]         | 11.3  | [10.6 - 16.6]       | 53.3  | [53.1 - 53.5]       |
| ICT => 2KG + CO2                    | 2.3   | [2.2 - 2.8]         | 11.3  | [9.6 - 15.7]        | 44.7  | [44.1 - 45.9]       |
| 2KG => SUC + CO2                    | 0.0   | [0.0 - 0.6]         | 8.3   | [6.6 - 12.7]        | 41.4  | [40.8 - 42.7]       |
| SUC => FUM                          | -3.0  | [-3.0 - -2.4]       | 8.3   | [7.6 - 13.6]        | 50.0  | [49.8 - 50.3]       |
| FUM <=> MAL                         | -3.0  | [-3.0 - -2.4]       | 8.3   | [7.6 - 13.6]        | 50.0  | [49.8 - 50.3]       |
| MAL <=> OAA                         | 1.6   | [1.5 - 2.2]         | 8.3   | [8.1 - 15.0]        | 58.6  | [57.5 - 59.2]       |
| ICT => GLX + SUC                    | 4.6   | [4.5 - 4.7]         | 0.0   | [-0.2 - 2.2]        | 8.6   | [7.5 - 9.1]         |
| GLX + ACA => MAL                    | 4.6   | [4.5 - 4.7]         | 0.0   | [-0.2 - 2.2]        | 8.6   | [7.5 - 9.1]         |
| 6PG => G3P + PYR                    | 19.7  | [19.7 - 22.9]       | 5.7   | [3.0 - 20.3]        | 28.7  | [27.6 - 29.1]       |
| ACA => ACT                          | 86.2  | [86.2 - 86.2]       | 135.4 | [135.4 - 135.4]     | 104.1 | [104.1 - 104.1]     |
| SUC =>                              | 7.6   | [7.6 - 7.6]         | 0.0   | [0.0 - 0.0]         | 0.0   | [0.0 - 0.0]         |
| <b>Exchange coefficient</b>         |       |                     |       |                     |       |                     |
| G6P <=> F6P                         | 0.99  | [0.95 - 0.99]       | 0.99  | [0.96 - 0.99]       | 0.93  | [0.81 - 0.99]       |
| F16P <=> DHAP + G3P                 | 0.55  | [0.53 - 0.57]       | 0.72  | [0.70 - 0.77]       | 0.77  | [0.74 - 0.79]       |
| DHAP <=> G3P                        | 0.93  | [0.92 - 0.94]       | 0.94  | [0.92 - 0.96]       | 0.94  | [0.93 - 0.96]       |
| 3PG <=> PEP                         | 0.20  | [0.11 - 0.49]       | 0.99  | [0.27 - 0.88]       | 0.75  | [0.39 - 0.83]       |
| PEP + CO2 <=> OAA                   | 0.36  | [0.20 - 0.52]       | 0.36  | [0.28 - 0.78]       | 0.17  | [0.14 - 0.21]       |
| Ru5P <=> X5P                        | 0.21  | [0.15 - 0.21]       | 0.74  | [0.57 - 0.99]       | 0.10  | [0.05 - 0.14]       |
| Ru5P <=> R5P                        | 0.99  | [0.86 - 0.99]       | 0.58  | [0.33 - 0.79]       | 0.99  | [0.94 - 0.99]       |
| R5P + X5P <=> S7P + G3P             | 0.51  | [0.40 - 0.61]       | 0.00  | [0.00 - 0.03]       | 0.03  | [0.02 - 0.07]       |
| S7P + G3P <=> E4P + F6P             | 0.30  | [0.25 - 0.34]       | 0.87  | [0.84 - 0.91]       | 0.92  | [0.85 - 0.96]       |
| X5P + E4P <=> F6P + G3P             | 0.00  | [0.00 - 0.01]       | 0.14  | [0.06 - 0.14]       | 0.00  | [0.00 - 0.01]       |
| FUM <=> MAL                         | 0.99  | [0.72 - 0.99]       | 0.53  | [0.36 - 0.82]       | 0.59  | [0.37 - 0.78]       |
| MAL <=> OAA                         | 0.99  | [0.95 - 0.99]       | 0.22  | [0.16 - 0.61]       | 0.00  | [0.00 - 0.12]       |
| <sup>13</sup> CO <sub>2</sub> ratio | 0.94  | [0.94 - 0.95]       | 0.87  | [0.85 - 0.91]       | 0.90  | [0.90 - 0.96]       |
