# Supplementary material for: Metabolic regulation analysis of wild-type and arcA mutant Escherichia coli under nitrate conditions using different levels of omics data
Source: Royal Society of Chemistry journal article supplement (doi:10.1039/c2mb25069a), 2012-05-17
Supplement: c2mb25069a_3.pdf [file c2mb25069a_3.pdf]

## Supplementary Table SIII

| Strain | Condition | Metabolite | Origin* | Mass isotopomer distribution |                |                |                |                |                |                |       |       |
|--------|-----------|------------|---------|------------------------------|----------------|----------------|----------------|----------------|----------------|----------------|-------|-------|
|        |           |            |         | m <sub>0</sub>               | m <sub>1</sub> | m <sub>2</sub> | m <sub>3</sub> | m <sub>4</sub> | m <sub>5</sub> | m <sub>6</sub> |       |       |
| WT     | Ø2        | F16P       | Exp     | 0.203                        | 0.566          | 0.197          | 0.031          | 0.003          | 0.000          | 0.000          |       |       |
|        |           |            | Sim     | 0.201                        | 0.563          | 0.185          | 0.043          | 0.007          | 0.001          | 0.000          |       |       |
|        |           | DHAP       | Exp     | 0.547                        | 0.423          | 0.026          | 0.004          |                |                |                |       |       |
|        |           |            | Sim     | 0.537                        | 0.414          | 0.042          | 0.006          |                |                |                |       |       |
|        |           | 3PG        | Exp     | 0.563                        | 0.399          | 0.031          | 0.006          |                |                |                |       |       |
|        |           |            | Sim     | 0.563                        | 0.389          | 0.042          | 0.007          |                |                |                |       |       |
|        |           | PEP        | Exp     | 0.554                        | 0.407          | 0.033          | 0.006          |                |                |                |       |       |
|        |           |            | Sim     | 0.561                        | 0.392          | 0.042          | 0.006          |                |                |                |       |       |
|        |           | Ru5P       | Exp     | 0.413                        | 0.417          | 0.169          | 0.000          | 0.000          | 0.000          |                |       |       |
|        |           |            | Sim     | 0.403                        | 0.414          | 0.158          | 0.021          | 0.003          | 0.000          |                |       |       |
|        |           | R5P        | Exp     | 0.406                        | 0.425          | 0.159          | 0.010          | 0.000          | 0.000          |                |       |       |
|        |           |            | Sim     | 0.404                        | 0.414          | 0.158          | 0.021          | 0.003          | 0.000          |                |       |       |
|        |           | CIT        | Exp     | 0.310                        | 0.442          | 0.209          | 0.038          | 0.000          | 0.000          | 0.000          |       |       |
|        |           |            | Sim     | 0.323                        | 0.441          | 0.196          | 0.035          | 0.005          | 0.001          | 0.000          |       |       |
|        |           | FUM        | Exp     | 0.534                        | 0.375          | 0.082          | 0.009          | 0.000          |                |                |       |       |
|        |           |            | Sim     | 0.521                        | 0.405          | 0.066          | 0.007          | 0.001          |                |                |       |       |
|        |           | MAL        | Exp     | 0.530                        | 0.381          | 0.081          | 0.009          | 0.000          |                |                |       |       |
|        |           |            | Sim     | 0.520                        | 0.405          | 0.067          | 0.008          | 0.001          |                |                |       |       |
|        |           | WT         | NO3     | F16P                         | Exp            | 0.331          | 0.472          | 0.169          | 0.025          | 0.003          | 0.000 | 0.000 |
|        |           |            |         |                              | Sim            | 0.330          | 0.470          | 0.171          | 0.024          | 0.005          | 0.000 | 0.000 |
| DHAP   | Exp       |            |         | 0.614                        | 0.360          | 0.026          | 0.000          |                |                |                |       |       |
|        | Sim       |            |         | 0.614                        | 0.359          | 0.022          | 0.005          |                |                |                |       |       |
| 3PG    | Exp       |            |         | 0.626                        | 0.349          | 0.025          | 0.000          |                |                |                |       |       |
|        | Sim       |            |         | 0.625                        | 0.344          | 0.026          | 0.005          |                |                |                |       |       |
| PEP    | Exp       |            |         | 0.630                        | 0.345          | 0.025          | 0.000          |                |                |                |       |       |
|        | Sim       |            |         | 0.626                        | 0.344          | 0.025          | 0.005          |                |                |                |       |       |
| Ru5P   | Exp       |            |         | 0.532                        | 0.373          | 0.089          | 0.006          | 0.000          | 0.000          |                |       |       |
|        | Sim       |            |         | 0.527                        | 0.368          | 0.092          | 0.011          | 0.002          | 0.000          |                |       |       |
| R5P    | Exp       |            |         | 0.521                        | 0.365          | 0.094          | 0.019          | 0.000          | 0.000          |                |       |       |
|        | Sim       |            |         | 0.527                        | 0.368          | 0.092          | 0.011          | 0.002          | 0.000          |                |       |       |
| CIT    | Exp       |            |         | 0.355                        | 0.425          | 0.187          | 0.033          | 0.000          | 0.000          | 0.000          |       |       |
|        | Sim       |            |         | 0.351                        | 0.430          | 0.181          | 0.034          | 0.004          | 0.000          | 0.000          |       |       |
| FUM    | Exp       |            |         | 0.504                        | 0.405          | 0.083          | 0.009          | 0.000          |                |                |       |       |
|        | Sim       |            |         | 0.503                        | 0.401          | 0.087          | 0.007          | 0.001          |                |                |       |       |
| MAL    | Exp       |            |         | 0.508                        | 0.402          | 0.082          | 0.008          | 0.000          |                |                |       |       |
|        | Sim       |            |         | 0.507                        | 0.398          | 0.085          | 0.008          | 0.001          |                |                |       |       |
| ArcA   | NO3       |            |         | F16P                         | Exp            | 0.267          | 0.476          | 0.216          | 0.037          | 0.005          | 0.000 | 0.000 |
|        |           |            |         |                              | Sim            | 0.269          | 0.478          | 0.219          | 0.027          | 0.006          | 0.001 | 0.000 |
|        |           | DHAP       | Exp     | 0.557                        | 0.418          | 0.025          | 0.000          |                |                |                |       |       |
|        |           |            | Sim     | 0.555                        | 0.416          | 0.023          | 0.005          |                |                |                |       |       |
|        |           | 3PG        | Exp     | 0.568                        | 0.403          | 0.029          | 0.000          |                |                |                |       |       |
|        |           |            | Sim     | 0.568                        | 0.395          | 0.030          | 0.007          |                |                |                |       |       |
|        |           | PEP        | Exp     | 0.564                        | 0.396          | 0.035          | 0.005          |                |                |                |       |       |
|        |           |            | Sim     | 0.565                        | 0.397          | 0.032          | 0.006          |                |                |                |       |       |
|        |           | Ru5P       | Exp     | 0.436                        | 0.428          | 0.125          | 0.011          | 0.000          | 0.000          |                |       |       |
|        |           |            | Sim     | 0.411                        | 0.424          | 0.148          | 0.015          | 0.003          | 0.000          |                |       |       |
|        |           | R5P        | Exp     | 0.387                        | 0.421          | 0.171          | 0.021          | 0.000          | 0.000          |                |       |       |
|        |           |            | Sim     | 0.411                        | 0.424          | 0.148          | 0.015          | 0.003          | 0.000          |                |       |       |
|        |           | CIT        | Exp     | 0.267                        | 0.402          | 0.250          | 0.080          | 0.000          | 0.000          | 0.000          |       |       |
|        |           |            | Sim     | 0.258                        | 0.412          | 0.245          | 0.071          | 0.012          | 0.002          | 0.000          |       |       |
|        |           | FUM        | Exp     | 0.372                        | 0.426          | 0.184          | 0.018          | 0.000          |                |                |       |       |
|        |           |            | Sim     | 0.363                        | 0.435          | 0.173          | 0.027          | 0.002          |                |                |       |       |
|        |           | MAL        | Exp     | 0.362                        | 0.435          | 0.176          | 0.028          | 0.000          |                |                |       |       |
|        |           |            | Sim     | 0.363                        | 0.434          | 0.173          | 0.028          | 0.003          |                |                |       |       |

\*Exp, experimentally determined; Cal, calculated.
